# Supplementary material
Source: Springer Nature journal article supplement (https://www.springermedizin.de/resource/supplementary/12985_2010_861_MOESM2_ESM.pdf/9608610)

M

1

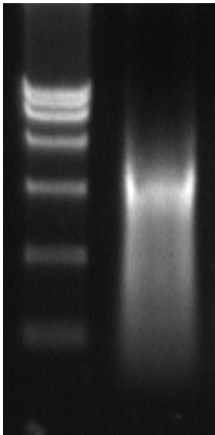

Supplement: MOESM2 [file 9608610]
